# Supplementary material for: TROPOMI NO 2 for urban and polluted areas globally from 2019 to 2024
Source: Copernicus journal article supplement (doi:10.5194/egusphere-2025-3178), 2025-07-14
Supplement: Supplementary file [file egusphere-2025-3178-AC2-supplement.pdf]

Response to Reviewer 1:

The manuscript titled “TROPOMI NO<sub>2</sub> for urban and polluted areas globally from 2019 to 2024” presents a comprehensive analysis on NO<sub>2</sub> VCD changes in cities worldwide. It details the contrasts in NO<sub>2</sub> trends across cities, and potential drivers the embedded anthropogenic emissions, including environmental regulation, local economic growth and regional conflicts. Although the study illustrates the latest evolution of global air pollution, and offers a valuable reference for future research, the manuscript, in its current form, contains several critical issues that warrant major revisions. Therefore, I recommend reconsideration for its publication after the authors adequately address the concerns outlined below.

We sincerely thank the reviewer for the thoughtful review to improve the quality of this manuscript.

The current manuscript lacks a discussion of the uncertainty of NO<sub>2</sub> VCDs and its potential impacts on the conclusions. This information is crucial for distinguishing trends from interannual fluctuations, and for separating meaningful emission changes from the noise inherent in satellite retrievals. However, uncertainty considerations are absent from the main text and figures. In addition, further validation of the NO<sub>2</sub> background values is necessary, along with sensitivity tests (e.g. evaluating the results using different percentile thresholds in the background selection). The interannual variability of the background should also be evaluated (e.g. in Fig. 12), as this could influence the interpretation of relative changes in VCD enhancements. Moreover, the spatial consistency of the background should be examined, particularly in regions where adjacent cities are expected to share similar background levels.

We appreciate this feedback, and have made the following additions to the manuscript to address these concerns:

1. We have now added statistical significance testing to all trend plots. Significance is determined through linear regression on monthly de-seasonalized TROPOMI time series (see revised Sec. 2.3). We successfully show that statistically significant trends can be separated from insignificant trends from the monthly TROPOMI data from 2019 to 2024, (e.g. in Figures 2-5), and that this time period is not too short.
2. To address general uncertainty within TROPOMI retrievals, we added text to note the 15-20% relative uncertainty related to monthly and annual averages, as highlighted in a recent previous study (Glissenaar et al., 2025). We also added text to mention the systemic biases of operational TROPOMI NO<sub>2</sub> retrievals, that can lead to underestimated NO<sub>2</sub> VCDs over highly polluted regions (-31.4% bias for values  $>15 \times 10^{15}$ ) and overestimated (+26.5% bias) NO<sub>2</sub> VCDs in less-polluted regions with VCDs  $<2 \times 10^{15}$  (Lambert et al., 2025). To address uncertainty associated with estimates at the city and country level, we have included uncertainty estimates when reporting relevant values.
3. We thank the reviewer for the suggestion to re-evaluate the method used to quantify the background NO<sub>2</sub> concentration. We have added a section to the supplementary document (Section S1 Sensitivity of Urban Background NO<sub>2</sub> VCDs) in which we conduct a sensitivity test to evaluate the impact of using different percentile thresholds on the results related to the VCD enhancement (previously Figure 12, which has now been split up into multiple figures). In that supplementary section, we test using different percentile thresholds as the background concentration and find that changing the used percentile does not meaningfully impact our results nor change the directionality of the trends. Following this analysis, we find that the 50<sup>th</sup> percentile as the threshold is an adequate choice for most

cities (See Supplementary information). In that same section we highlight test case of large adjacent cities and how the background concentrations for those cities vary. Although more sophisticated methods of background quantification exist (Fioletov et al., 2025) we find that using a percentile as an assumed background concentration is an acceptable choice given the large number of cities being evaluated ( $N > 11,000$ ).

4. Based on comments from this and the other reviewers, we have made substantial changes to the revised manuscript, by rearranging many of the figures and sections for clarity. We are confident these changes greatly improve the quality of this work.

The manuscript includes several qualitative descriptions that are not supported by sufficient validation or statistical testing. For instance, it states that there is an accelerated decreasing trend in  $\text{NO}_2$  VCDs in both China and European countries. However, given that the dataset used in this study begins in 2019, the time range may be too short to detect or validate such trend acceleration. Similarly, the manuscript mentions an accelerated  $\text{NO}_2$  increase over Moscow in early 2022. Yet, Fig. S9 appears to show only a brief, anomalous spike in  $\text{NO}_2$  VCDs, followed by a return to typical levels. These interpretations, as currently presented, are questionable and require rigorous statistical validations.

We have greatly expanded the statistical testing within this iteration of the manuscript and have removed any claims of “accelerating” trends. Significance is determined through linear regression on de-seasonalized TROPOMI time series (see revised Sec. 2.3). We successfully show that statistically significant trends can be separated from insignificant trends from the monthly TROPOMI data from 2019 to 2024 (e.g. in Figures 2-5), and that this time period is not too short.

The manuscript appears to insufficiently account for the effects of seasonality on  $\text{NO}_2$  VCDs. Given the strong seasonal variation in  $\text{NO}_x$  lifetime, particularly the longer lifetime during winter,  $\text{NO}_2$  VCDs in colder months can disproportionately influence interannual trends if seasonality is not properly addressed. However, the manuscript lacks adequate discussion or correction for these seasonal effects. Moreover, there appears to be a mischaracterization of seasons between the Northern and Southern Hemispheres. For instance, the manuscript uses data from the same calendar months to represent winter conditions in both Asia and Oceania. This approach is problematic, as most cities in Oceania are located in the Southern Hemisphere, where the seasonal cycle is inverted. As a result, the analysis may misrepresent seasonal trends in these regions, and further clarification or adjustment is necessary.

We thank the reviewer for addressing the question of seasonality in our work. To address these points, we have:

1. Replaced any existing monthly time series within this study with de-seasonalized trends. This was done for Figure 12 (previously Figure 3) and Figure 3 (previously Figure 8).
2. We have now included a more robust analysis of statistical significance throughout the manuscript. We use the de-seasonalized data to quantify significance of any trends.
3. We have addressed the discrepancy between Northern and Southern hemispheric cities by removing and reference to “warmer months” or “colder months” or season names, particularly when discussing South America, Africa or the lumped Asia and Oceania section. We instead refer to the months of observations, e.g. May-September.

## 89 Specific Comments

90 Page 2, Line 56-67: I would suggest to include a brief overview about NO<sub>2</sub> VCD changes in India,  
91 Oceania and Africa here, since these regions also play important roles in this study.

92 We appreciate this suggestion. We have added the following text at line 67 of the revised  
93 manuscript:

94 “In contrast, urban regions of India have shown NO<sub>2</sub> increases over the past few decades, linked  
95 to urbanization and energy demand growth (Hilboll et al., 2013; Ghude et al., 2020). Over Africa  
96 and South America, NO<sub>2</sub> VCD trends through the mid-2010s have been less pronounced,  
97 reflecting limited industrialization and more dominant contributions from biomass burning and  
98 natural sources (Geddes et al., 2016; Castellanos et al., 2014).”

99 Page 2, Line 59: “x” --> “x”. Check throughout the manuscript.

100 Thank you for pointing this out. We have made the change to all mentions within the manuscript  
101 as well as any figures using the notation.

102 Page 4, Line 97: It should be explained why GHS-SMOD boundaries are used rather than  
103 administrative city boundaries, and clarify whether this choice affects the results.

104 Thank you for this question. To our knowledge, a dataset of true administrative / legislatively  
105 determined boundaries for all urban regions globally does not exist. We have added the following  
106 text at line 102 of the revised manuscript to emphasize the value of using GHS-SMOD:

107 “GHS-SMOD has the benefit of providing a globally consistent, satellite-derived definition of built-  
108 up areas, whereas administrative boundaries vary widely in definition and availability. Using  
109 physical built-up area boundaries from GHS-SMOD instead of administrative ones may shift the  
110 absolute spatial extent of some cities, but it does not materially alter the concentrations calculated  
111 in this study.”

112 Page 4, Line 111: According the latest ATBD (2.8.0, 2024-11-18– released) for TROPOMI NO<sub>2</sub>,  
113 the nadir ground pixel dimensions were 7.0 × 3.5 km<sup>2</sup> before 6 August 2019. The data description  
114 here is inaccurate.

115 Thank you for pointing this out. We have modified the text at line 121 of the revised manuscript  
116 to reflect the difference in spatial resolution before 06 August, 2019:

117 “These Level 2 data have a nadir spatial resolution of 3.5 x 7.0 km<sup>2</sup> before and 3.5 x 5.5 km<sup>2</sup> after  
118 06 August 2019.”

119 Page 6, line 142: Sensitivity tests should be conducted to assess the impact of using different  
120 percentile values in background selection. In addition, validation is needed. For example, by  
121 examining whether background values are consistent across adjacent cities.

122 We appreciate this suggestion. We have added a section to the supplement titled “S1 Sensitivity  
123 of Urban Background NO<sub>2</sub> VCDs”, where we (1) describe the method used to quantify background  
124 concentrations, (2) provide results of a sensitivity analysis evaluating the impact of different

125 percentiles on the general conclusions we've drawn within this manuscript, (3) an evaluation of  
126 trends in urban background VCDs over time and (4) the impact and evaluation of background for  
127 adjacent cities / clusters of cities. In short, following this thorough analysis, we have updated the  
128 choice of background concentration to the 50<sup>th</sup> percentile. We test using different percentile  
129 thresholds as the background concentration and generally find that changing the used percentile  
130 does not meaningfully impact our results nor change the directionality of the trends. Please refer  
131 to the revised methods section (Sec. 2.4) and the supplement document for more information.

132 Page 6, Line 157: The claimed acceleration in the decreasing trend requires statistical validation;  
133 otherwise, such descriptions might be just removed. (Also, for the descriptions on Page 10, Line  
134 239, Page 10, Line 221, and Page 14, Line 310)

135 Based on this recommendation, we have changed the phrasing of this specific text to no longer  
136 claim an accelerated trend, but rather a continued decreasing trend. We note that the statistical  
137 analysis in this revised submission has been greatly expanded, and there are now many  
138 references to statistical significance of trends throughout this work.

139 Page 7, Line 164: Please clarify the definition of the mining regions (including A, C in Fig. 2; B in  
140 Fig. 4; D, E in Fig. S4; and G, F, H, I in Fig. 6).

141 We have added the description of the mining regions within the captions of each figure (Figures  
142 6-11 in the revised manuscript)

143 Page 7, Line 166: The texts in Fig. S3 are not clear.

144 We have increased the text size in the legends in the top left of each panel. This is now Figure  
145 S20.

146 Page 8, Figure 3: The information of NO<sub>2</sub> VCD uncertainty and significance tests on the  
147 regression is missing. In addition, please ensure consistency of significant figures or decimal  
148 precision for all numerical data throughout the manuscript.

149 Thank you for this suggestion. We have now changed this figure to show de-seasonalized trends  
150 as a monthly % anomaly, from which trends can more clearly be quantified and visualized. For  
151 each panel, we have added the statistical significance of the trend by reporting a percent change  
152 per year, as well as a p-value. We have also updated the manuscript to ensure the use of  
153 consistent significant figures. See Sec. 2.3.

154 Page 9, Line 197: Please provide the specific number and proportion ("Nearly all").

155 Thank you for this suggestion. We have since removed this text for the sake of shortening the  
156 manuscript. However, we calculated that 66 of the 71 urban clusters in Eastern Russia (or 93%)  
157 exhibited larger 2024 NO<sub>2</sub> VCDs than in 2019.

158 Page 9, Figure 4: I would suggest standardizing the formatting of units throughout the manuscript  
159 for consistency.

160 We have double checked the manuscript to ensure that the units (e.g. 10<sup>15</sup> Molecules cm<sup>-2</sup>) are  
161 used consistently throughout the manuscript. If this is in reference to the range of plotted data on

162 the colorbars (e.g. -1 to 1 in Fig. 4 vs. -2 to 2 in Fig. 6), we find that different regions require  
163 different values on the color bar for the sake of effective data visualization, as not all regions  
164 experience a similar range of concentrations.

165 Page 10, Line 232: What is the term “largest” referring to or being compared against in this  
166 description? (other cities or other land type? Also, for the descriptions on Page 11, Line 248, Page  
167 11, Line 253-254, Page 12, Line 263-264 and Page 12, Line 270)

168 These are directly in reference to the largest observed annual mean concentrations or differences  
169 in the spatial figures (Now Figures 6-11 in Sections 5.1 – 5.5; largest concentration refers to data  
170 plotted in panel a, while largest increase/decrease refers to data plotted in panel b). In the case  
171 of Europe as is referenced here, we are claiming that the largest values occur in urban settings,  
172 as opposed to non-urban settings (See Fig. 8a). In reference to Moscow, we are stating that the  
173 largest concentrations in Europe were observed over Moscow. Hypothetically, a power plant, or  
174 coal mine or some other source outside of the urban environment could in theory be the largest  
175 signature for a region. We are simply noting that the largest signatures observed here are in urban  
176 environments. We have made sure that these figures are properly referred to in the revised  
177 manuscript.

178 Page 10, Line 236: Please provide the specific number.

179 We have added the modified the text on line 354 of the revised manuscript, which now reads:

180 “Of the 1257 urban clusters in Europe, 1007 (80%) exhibited larger VCDs in 2024 than in 2019.  
181 Of the 53 European urban clusters with a population greater than 1,000,000, 2024 VCDs were  
182 lower than 2019 VCDs in 48 (91%), with the exception of Moscow and other cities of western  
183 Russia, which experienced increases (Fig. 9b)”

184 Page 12, Section 4: I would suggest to integrate Section 3 and Section 4.

185 Thank you for this suggestion. We have largely restructured the manuscript by combining multiple  
186 sections, although the content generally remains the same. Section 3 now highlights trends in  
187 major urban areas, Section 4 quantifies country-level, population-weighted trends, Section 5  
188 highlights continental signatures and seasonality, and Section 6 highlights trends in major oil, gas  
189 and metal mining regions.

190 Page 13, Figure 7: The figure legend could be further improved to enhance readability.

191 We have increased the size of the legend for readability.

192 Page 14, Line 311: Typo.

193 Thank you, we have fixed the typo.

194 Page 14, Line 311: The abnormally high NO<sub>2</sub> VCD values require further examination to exclude  
195 artifacts, including applying data filters based on Level-2 QA flags. It should also be verified  
196 whether any spurious outliers affect the averaging process.

197 The oversampled level 3 TROPOMI NO<sub>2</sub> product we use in this study are quality controlled, with  
198 the recommended QA flag > 0.75 applied to the L2 data before oversampling. It removes cloud-  
199 covered scenes (cloud radiance fraction > 0.5), partially snow/ice covered scenes, errors, and  
200 problematic retrievals. The number of valid observations for the Moscow urban cluster during  
201 March 2022, when a monthly average value of  $59 \times 10^{15}$  molec. cm<sup>-2</sup> was calculated, had more  
202 observations (233) than the median March (159) in the six-year record. Despite the abnormally  
203 high value, this appears to be a valid mean value for that month.

204 Page 15, Figure 8: The figure labels/text are not clear.

205 We have increased the size of the text for readability.

206 Page 17, Line 349-350: Such causal relationships require careful validation. I recommend revising  
207 the statement here.

208 Thank you for pointing this out. Numerous studies have identified the impact of the shutdowns in  
209 China on VCDs within the country, which we cite on line 274 of the revised manuscript (Zheng et  
210 al., 2021; Cooper et al., 2022; Levelt et al., 2022; Ma et al., 2023; Zhao et al., 2024), to make  
211 clear this is a reference to previous studies and not determined from our work alone.

212 Page 18, Line 376: It is not immediately clear why population-weighted VCDs are preferred here  
213 over direct NO<sub>2</sub> VCDs for me. Would directly showing NO<sub>2</sub> VCDs make major differences?

214 We choose to use population-weighted VCDs when aggregating by region (continent or country),  
215 as it more accurately reflects the column concentration that people in a region's urban areas are  
216 exposed to. An equitable spatial average would give unnecessary weight to concentrations in less  
217 populous cities where fewer people live and the relative satellite uncertainties are larger.

218 Page 21, Line 433: Since the comparison here is based on the relative changes of VCDs and  
219 emissions with respect to 2019, it is hard to conclude that emissions are underestimated. At most,  
220 it may suggest a possible underestimation in the emission trend. (Also for Page 24, Line 481)

221 We apologize for the unclear language. We never meant to say that the emissions are  
222 underestimated in totality but instead underestimated trends. We have modified the text to reflect  
223 the year-to-year variability (i.e. trend) in the emissions inventory is likely underestimated based  
224 on discrepancies between its trends and TROPOMI's trends now on line 340:

225 "Evaluating trends in NO<sub>x</sub> emissions inventories in African cities, we find a mean difference of -  
226 8.0% (EDARv8.1) and -6.7% (CEDs) between inventory NO<sub>x</sub> emission trends and VCD<sub>ENH</sub>  
227 trends, indicating a potential underestimate in both emissions inventories in African cities for this  
228 period."

229 Page 21, Line 435: Impacts of uncertainty in VCD background need to be quantified.

230 We thank the reviewer for this suggestion. We have added a section to the revised supplement  
231 document that provides an analysis of the urban background concentrations. Please refer to the  
232 revised supplement document Section S1.

233 Page 21, Line 435: The mean difference is likely underestimated due to the inclusion of 2019.



234 Thank you for pointing this out. As 2019 has a value of 0, we have ensured that data from that  
235 year are not included in the average, and we have updated the relevant values.

236 Page 22, Line 451: There appears to be a mischaracterization of seasons between the Northern  
237 and Southern Hemispheres, since Asia and Oceania are shown together in Fig. 13.

238 Thank you for noting this. We have modified the text throughout the manuscript to refer to the  
239 months explicitly (e.g. May-September), as opposed to “warmer months” or “summer”, particularly  
240 when referring to South America, Africa and Oceania.

241 Page 23, Figure 13: Is the sharp increase during the winter of 2022 primarily driven by  
242 anomalously high values over Russia? If so, the authors should consider presenting additional  
243 results with Russia excluded. Intuitively, I find that this sharp increase appears inconsistent with  
244 Fig. 9c, where most cities do not show a similar increase in 2022.

245 Thank you for bringing up this point. The sharp increase observed in winter 2022 in Europe is  
246 indeed due to increases in Russian cities. We have created a version of this figure with Russian  
247 cities removed and added to the supplement as Figure S18, and added the following text to line  
248 373 of the revised/tracked changes manuscript:

249 “We note that the seasonal trends in Europe show notable winter and summer decrease if  
250 evaluating trends with Russian cities removed (Fig. S18).”

251 The noted difference in the magnitude for Europe in 2022 between previous Figure 13 and Figure  
252 9 is due to the fewer data points during winter. When averaged over the colder months, the 2022  
253 increase is stark, as seen in Figure 13. When averaging to an annual value, the higher number of  
254 observations in the warmer months, when an increase was not observed, dilutes the impact of  
255 the winter values.

256 Page 24: Line 481: Discussion about the impacts of NO<sub>x</sub> chemistry and its seasonality should be  
257 included.

258 Thank you for this suggestion. We have added the following text to line 510 of the revised  
259 manuscript:

260 “Additionally, while many of the trends presented here reflect changes in anthropogenic NO<sub>x</sub>  
261 emissions, it is important to recognize that atmospheric chemistry also influences the observed  
262 NO<sub>2</sub> variability. Seasonal differences in photochemical lifetimes (i.e., longest in winter), boundary  
263 layer mixing (i.e., more vertical mixing in summer), chemical partitioning between NO and NO<sub>2</sub>  
264 (i.e., the fraction of NO<sub>2</sub> is largest in winter) and meteorological variability can all modulate the  
265 magnitude and timing of observed trends. These processes likely contribute to some of the  
266 regional and seasonal differences highlighted in this study.”

267 Page 24, Line 491-492 (“tall-stack sources”): Could the authors provide supporting references for  
268 this statement?

269 We have added the citation to line 506 (Brett et al., 2025).

270

271

272 References

- 273 Brett, N., Arnold, S. R., Law, K. S., Raut, J.-C., Onishi, T., Barret, B., Dieudonné, E., Cesler-  
274 Maloney, M., Simpson, W., Bekki, S., Savarino, J., Albertin, S., Gilliam, R., Fahey, K.,  
275 Pouliot, G., Huff, D., and D'Anna, B.: Estimating Power Plant Contributions to Surface  
276 Pollution in a Wintertime Arctic Environment, *ACS ES&T Air*, 2, 943–956,  
277 <https://doi.org/10.1021/ACSESTAIR.5C00030>, 2025.
- 278 Cooper, M. J., Martin, R. V., Hammer, M. S., Levelt, P. F., Veefkind, P., Lamsal, L. N., Krotkov,  
279 N. A., Brook, J. R., and McLinden, C. A.: Global fine-scale changes in ambient NO<sub>2</sub> during  
280 COVID-19 lockdowns, *Nature* 2022 601:7893, 601, 380–387,  
281 <https://doi.org/10.1038/s41586-021-04229-0>, 2022.
- 282 Fioletov, V., McLinden, C. A., Griffin, D., Zhao, X., and Eskes, H.: Global seasonal urban,  
283 industrial, and background NO<sub>2</sub> estimated from TROPOMI satellite observations, *Atmos.*  
284 *Chem. Phys*, 25, 575–596, <https://doi.org/10.5194/acp-25-575-2025>, 2025.
- 285 Glissenaar, I., Boersma, K. F., Angloul, I., Rijdsdijk, P., Verhoelst, T., Compernelle, S., Pinardi,  
286 G., Lambert, J.-C., Van Roozendaal, M., and Eskes, H.: TROPOMI Level 3 tropospheric NO  
287 2 dataset with advanced uncertainty analysis from the ESA CCI+ ECV precursor project ,  
288 *Earth Syst Sci Data*, 17, 4627–4650, <https://doi.org/10.5194/ESSD-17-4627-2025>, 2025.
- 289 Lambert, J.-C. et al.: Quarterly Validation Report of the Copernicus Sentinel-5 Precursor  
290 Operational Data Products #28: April 2018 – August 2025, [https://mpc-](https://mpc-vdaf.tropomi.eu/ProjectDir/reports/pdf/S5P-MPC-IASB-ROCVR-28.00.00_FINAL_signed-jcl-AD.pdf)  
291 [vdaf.tropomi.eu/ProjectDir/reports/pdf/S5P-MPC-IASB-ROCVR-28.00.00\\_FINAL\\_signed-jcl-](https://mpc-vdaf.tropomi.eu/ProjectDir/reports/pdf/S5P-MPC-IASB-ROCVR-28.00.00_FINAL_signed-jcl-AD.pdf)  
292 [AD.pdf](https://mpc-vdaf.tropomi.eu/ProjectDir/reports/pdf/S5P-MPC-IASB-ROCVR-28.00.00_FINAL_signed-jcl-AD.pdf), 2025.
- 293 Levelt, P. F., Stein Zweers, D. C., Aben, I., Bauwens, M., Borsdorff, T., De Smedt, I., Eskes, H.  
294 J., Lerot, C., Loyola, D. G., Romahn, F., Stavrakou, T., Theys, N., Van Roozendaal, M.,  
295 Veefkind, J. P., and Verhoelst, T.: Air quality impacts of COVID-19 lockdown measures  
296 detected from space using high spatial resolution observations of multiple trace gases from  
297 Sentinel-5P/TROPOMI, *Atmos Chem Phys*, 22, 10319–10351, [https://doi.org/10.5194/ACP-](https://doi.org/10.5194/ACP-22-10319-2022)  
298 [22-10319-2022](https://doi.org/10.5194/ACP-22-10319-2022), 2022.
- 299 Ma, Q., Wang, J., Xiong, M., and Zhu, L.: Air Quality Index (AQI) Did Not Improve during the  
300 COVID-19 Lockdown in Shanghai, China, in 2022, Based on Ground and TROPOMI  
301 Observations, *Remote Sens.*, 15, 1295, <https://doi.org/10.3390/RS15051295/S1>, 2023.
- 302 Zhao, X., Li, X. X., Xin, R., Zhang, Y., and Liu, C. H.: Impact of Lockdowns on Air Pollution:  
303 Case Studies of Two Periods in 2022 in Guangzhou, China, *Atmos.* 2024, Vol. 15, Page  
304 1144, 15, 1144, <https://doi.org/10.3390/ATMOS15091144>, 2024.
- 305 Zheng, B., Zhang, Q., Geng, G., Chen, C., Shi, Q., Cui, M., Lei, Y., and He, K.: Changes in  
306 China's anthropogenic emissions and air quality during the COVID-19 pandemic in 2020,  
307 *Earth Syst. Sci. Data*, 13, 2895–2907, <https://doi.org/10.5194/ESSD-13-2895-2021>, 2021.

308
